1 **High-throughput phenotyping reveals a link between transpiration**  
2 **efficiency and transpiration restriction under high evaporative**  
3 **demand and new loci controlling water use-related traits in African**  
4 **rice, *Oryza glaberrima* Steud.**

5  
6 Pablo Affortit<sup>1\*</sup>, Branly Effa-Effa<sup>1,2\*</sup>, Mame Sokhatil Ndoye<sup>1,3</sup>, Daniel Moukouanga<sup>1</sup>, Nathalie  
7 Luchaire<sup>4</sup>, Llorenç Cabrera-Bosquet<sup>4</sup>, Maricarmen Perálvarez<sup>5</sup>, Raphaël Pilloni<sup>1</sup>, Claude  
8 Welcker<sup>4</sup>, Antony Champion<sup>1</sup>, Pascal Gantet<sup>1</sup>, Abdala Gamby Diedhiou<sup>6</sup>, Baboucarr Manneh<sup>7</sup>,  
9 Ricardo Aroca<sup>5</sup>, Vincent Vadez<sup>1,3,8,9</sup>, Laurent Laplaze<sup>1,8</sup>, Philippe Cubry<sup>1</sup>, Alexandre  
10 Grondin<sup>1,3,8§</sup>

11  
12 <sup>1</sup> DIADE, Université de Montpellier, IRD, CIRAD, Montpellier, France

13 <sup>2</sup> CENAREST, Libreville, Gabon

14 <sup>3</sup> CERAAS, Thiès, Senegal

15 <sup>4</sup> LEPSE, Université de Montpellier, INRAE, Institut Agro, Montpellier, France

16 <sup>5</sup> CSIC, Granada, Spain

17 <sup>6</sup> Université Cheikh Anta Diop, Dakar, Senegal

18 <sup>7</sup> AfricaRice center, Saint-Louis, Senegal

19 <sup>8</sup> LMI LAPSE, Dakar, Senegal

20 <sup>9</sup> ICRISAT, Patancheru, India

21  
22 \*Equal contribution

23 <sup>§</sup>Corresponding author: [alexandre.grondin@ird.fr](mailto:alexandre.grondin@ird.fr)

24 **Abstract**

25 Because water availability is the most important environmental factor limiting crop  
26 production, improving water use efficiency, the amount of carbon fixed per water used, is a  
27 major target for crop improvement. In rice, the genetic bases of transpiration efficiency, the  
28 derivation of water use efficiency at the whole-plant scale, and its putative component trait  
29 transpiration restriction under high evaporative demand, remain unknown. These traits were  
30 measured in a panel of 147 African rice *Oryza glaberrima* genotypes, known as potential  
31 sources of tolerance genes to biotic and abiotic stresses. Our results reveal that higher  
32 transpiration efficiency is associated with transpiration restriction in African rice. Detailed  
33 measurements in a subset of highly differentiated genotypes confirmed these associations  
34 and suggested that the root to shoot ratio played an important role in transpiration restriction.  
35 Genome wide association studies identified marker-trait associations for transpiration  
36 response to evaporative demand, transpiration efficiency and its residuals, that links to genes  
37 involved in water transport and cell wall patterning. Our data suggest that root shoot  
38 partitioning is an important component of transpiration restriction that has a positive effect  
39 on transpiration efficiency in African rice. Both traits are heritable and define targets for  
40 breeding rice with improved water use strategies.

41

42 **Key-words**

43 Rice, Transpiration, Roots, Genome-Wide Association Study

## 44 Introduction

45 Rice is the staple food for more than half of the world's population and its consumption is  
46 continuously growing. In Africa, rice is mainly cultivated in the Western part of the continent,  
47 where its production increased by 104.3 % from 2009 to 2019 (FAOSTAT, 2021). A further  
48 increase of 79.4 % will be needed by 2025 to meet the projected local demand (FAOSTAT,  
49 2021). Most of the rice grown worldwide is of *Oryza sativa* L. (Asian rice) type that has high  
50 yield potential. In West Africa, improving rice productivity is challenged by the reduction of  
51 water resources for agriculture due to dryer and hotter climates and increased competition  
52 from cities and industries due to rapid population growth (van Oort and Zwart, 2018). In this  
53 context, developing agronomic approaches that reduce water use (e.g. aerobic rice or  
54 alternate wet and dry cultivation) and rice varieties with better water use efficiency (WUE) is  
55 of major interest.

56 WUE corresponds to the ratio of plant carbon gain to water use (Leakey *et al.*, 2019).  
57 Beneath this simple definition are a number of component traits (root water uptake or  
58 photosynthesis for instance) and numerous surrogate traits (e.g. carbon isotope  
59 discrimination or specific leaf area) making WUE a broad idea that can be conceptualized at  
60 multiple scales (Hatfield and Dold, 2019). At the plant scale, WUE is described as transpiration  
61 efficiency (TE), i.e. the ratio between biomass (usually shoot biomass) and total water  
62 transpired to produce this biomass (Vadez *et al.*, 2014). Heritable variations in TE have been  
63 observed in a number of species including *Arabidopsis thaliana* (Vasseur *et al.*, 2014), sorghum  
64 (Vadez *et al.*, 2011), groundnut (Vadez and Ratnakumar, 2016) or foxtail millet (Krishnamurthy  
65 *et al.*, 2016; Feldman *et al.*, 2018). In rice, genetic determinants of intrinsic WUE measured  
66 through carbon isotope discrimination have been observed (This *et al.*, 2010), but although  
67 genetic variation in TE exists (Ouyang *et al.*, 2017), genetic dissection of TE has not been  
68 reported. Enhanced expression of several genes involved in diverse physiological mechanisms  
69 such as gibberellin-plant mediated architecture modifications (*OsGA2*; Lo *et al.*, 2017),  
70 promotion of lateral root initiation (*OshVA1*; Chen *et al.*, 2015), reduced stomatal density  
71 (*AtERECTA*; Shen *et al.*, 2015) or promotion of photosynthesis assimilation in mesophyll cells  
72 (*AtHARDY*; Karaba *et al.*, 2007) specifically improved TE under irrigated conditions in rice,  
73 highlighting the complexity of this trait.

74 Transpiration restriction is another physiological mechanism that can improve TE  
75 (Sinclair *et al.*, 2017). For the plant, this strategy translates into opening its stomata and

76 maximizing C assimilation when the vapor pressure deficit (VPD) in the air is below a certain  
77 threshold (usually between 1.5 to 2.5 kPa), and closing its stomata when VPD exceeds this  
78 threshold resulting in lower stomatal conductance and consequently reducing water use  
79 (Condon, 2020). Transpiration restriction can be measured by the slope of the transpiration  
80 response to increasing VPD or by the inflexion point in transpiration response (usually  
81 inversely correlated with the slope). Large genetic variations in transpiration response to  
82 increasing VPD have been observed in maize (Gholipoor *et al.*, 2013), wheat (Medina *et al.*,  
83 2019), sorghum (Choudhary and Sinclair, 2014; Choudhary *et al.*, 2020) or pearl millet  
84 (Kholová *et al.*, 2010), suggesting that this response is determined by genetic factors (Vadez  
85 *et al.*, 2014; Sinclair *et al.*, 2017). In pearl millet, transpiration restriction was associated with  
86 terminal drought tolerance and quantitative trait loci (QTLs) controlling both traits were found  
87 to colocalize (Kholová *et al.*, 2010, 2012). Although transpiration restriction can lead to  
88 reduction in biomass as observed in wheat plants grown under irrigated environments  
89 (Medina *et al.*, 2019), it can also lead to soil water conservation at vegetative stage and  
90 improve yield in pearl millet plants grown under drought stress (Vadez *et al.*, 2013).  
91 Transpiration restriction could therefore be an interesting trait to deploy for improving TE and  
92 drought tolerance of upland rice grown under dry, hot and drought-prone environments of  
93 West Africa.

94 African rice *O. glaberrima* Steud. was domesticated in the inner Niger delta from a wild  
95 Sahelian ancestor *O. barthii* A. Chev. (Cubry *et al.*, 2018). It is adapted to dry environments  
96 and has raised the interest of the scientific community because of its potential reservoir of  
97 tolerance genes to biotic and abiotic stresses (Wang *et al.*, 2014). Recently, high-depth re-  
98 sequencing data of 163 *O. glaberrima* genotypes originating from diverse environments in  
99 West Africa was used to infer the origin of domestication of African rice (Cubry *et al.*, 2018).  
100 This panel was further used to identify QTLs associated with flowering time, panicle  
101 architecture and resistance to *Rice yellow mottle virus*, providing insights into the adaptive  
102 variation of African rice as compared to Asian rice (Cubry *et al.*, 2020). Due to its adaptation  
103 to contrasted environments, we hypothesized that *O. glaberrima* could also be a source of  
104 interesting alleles for improving TE. Here, we phenotyped 147 fully sequenced *O. glaberrima*  
105 genotypes for shoot growth and water use dynamics to derive transpiration restriction, TE and  
106 its residuals at 29 days after sowing. A subset of contrasted genotypes for TE were further

107 studied to better understand the physiological determinants of these complex traits and  
108 genome wide association studies (GWAS) allowed the dissection of their genetic bases.

109

## 110 **Material and methods**

### 111 *Plant material*

112 A panel of 147 fully sequenced traditional cultivated genotypes of African rice (*O. glaberrima*)  
113 that were sampled from 1974 to 2005 mainly in West Africa, with few genotypes from East  
114 Africa was used in this study (Cubry *et al.*, 2018).

115

### 116 *Plant growth conditions and measurements*

#### 117 *Large-scale phenotyping experiment*

118 Large-scale phenotyping of shoot growth and water use in the *O. glaberrima* panel was  
119 performed using the PhenoArch platform hosted at M3P, Montpellier Plant Phenotyping  
120 Platforms (<https://www6.montpellier.inra.fr/lepse/M3P>) located at INRAE Montpellier  
121 (43°37'03.6"N; 3°51'27.9"E). Dehusked seeds were sown in biodegradable tray pots (55%  
122 white peat and 45% woodpulp, pH 5.0; Jiffy) containing a mix of fine clay (20%) and fine, blond  
123 and black (30, 10 and 40%, respectively) peats at pH 6, and amended with 1.5kg of 14-16-18  
124 N-P-K for 25 L (Substrat SP 15%, KLASMANN). From sowing to 15 days after sowing (DAS),  
125 plants were grown under irrigated conditions in a greenhouse at the Institut de Recherche  
126 pour le Développement (IRD) in Montpellier (43°38'41.31"N; 3°51'57.3"E) under 12h  
127 photoperiod, day temperature of 28°C, night temperature of 25°C and with 60-70% humidity.  
128 Fifteen days after sowing, plants were transferred to the PhenoArch greenhouse and  
129 individual seedlings in their biodegradable pot were transplanted into 9L pots filled with the  
130 same soil. Plants were exposed to the same environmental conditions as in IRD facilities and  
131 grown for two more weeks under irrigated conditions (soil water potential maintained at  
132 -0.05 MPa). The experiment was arranged in a randomized complete block design with seven  
133 replications.

134 The PhenoArch platform is structured as a conveyor belt feeding the plants to imaging  
135 or watering units as described in Cabrera-Bosquet *et al.*, (2016). The shoot imaging unit is  
136 composed of three cabins equipped with top and side RGB cameras and LED illumination. The  
137 watering units are composed of five weighing terminals and high-precision pumps that allow  
138 monitoring of the soil water content. Imaging and watering routines were sequentially

139 performed every day from 18 to 29 DAS. Plants were further moved back to the same positions  
140 and orientation in order to keep position throughout the experiment.

141 Shoot biomass and leaf area were estimated every day from images. Briefly, RGB  
142 images were taken for each plant from 13 views (12 side views from 30° rotational difference  
143 and one top view) and pixels from each image were extracted from those of the background  
144 as described in Brichet *et al.* (2017). Whole plant leaf area and shoot fresh weight were then  
145 estimated using calibration curves built using multiple linear regression models based on  
146 processed images against ground truth measurements of leaf area and fresh biomass  
147 (Supplementary Fig. S1).

148 Leaf area and daily water lost by the pot was used to measure transpiration rate. Plant  
149 daily water uptake from 18 to 29 DAS was added to calculate total water uptake. Transpiration  
150 efficiency (TE) was measured as the ratio between shoot fresh weight and total water uptake  
151 at 29 DAS. Because shoot mass is intrinsically related to plant water use, the residuals of TE  
152 (TEr) were calculated as the genotype-specific deviation from the least squares linear  
153 regression between total water uptake and shoot fresh weight measured at 29 DAS. Reference  
154 evapotranspiration was calculated according to the Penman-Monteith formula (Zotarelli *et*  
155 *al.*, 2014), as a proxy for the evaporative demand. Averaged transpiration rate was then  
156 plotted against maximum reference evapotranspiration for five windows of time, i.e. at 23,  
157 25, 26, 27 and 28 DAS for each genotype and the slope of the corresponding linear regression  
158 was calculated to evaluate transpiration response to evaporative demand (SlopeTR).

159

#### 160 *Small-scale phenotyping experiment*

161 A sub-set of ten genotypes contrasting for shoot biomass (Og\_118, Og\_12, Og\_162, Og\_61,  
162 Og\_62, Og\_15, Og\_184, Og\_185, Og\_408 and Og\_43) was grown at IRD in 5.5L pots containing  
163 a potting mixture (M2 substrate, Jiffy) receiving optimal fertilization and under the same  
164 environmental conditions as above with five replications per genotypes. Pots were  
165 randomized and soil was well irrigated and covered with 2-3 cm of plastic beads to prevent  
166 soil evaporation. At 29 DAS, pots were transferred into an adjacent greenhouse on top of  
167 balances monitoring weight every 30 min (Phenospex Ltd). Vapor pressure deficit (VPD) was  
168 monitored and reached values around 4-5 KPa around noon. At 36 DAS, leaves were harvested  
169 to measure leaf area using a planimeter (LI-3100C, LI-COR), shoot fresh weight and tiller  
170 number. Plant water uptake from 29 to 36 DAS was used to calculate total water uptake. The

171 root system was carefully washed from the soil and placed, along with fresh shoots, into an  
172 oven for 3 days at 60°C to measure root dry weight, shoot dry weight and root to shoot ratio.  
173 TE and TEr were calculated from shoot fresh weight and total water uptake at 36 DAS as in the  
174 large-scale experiment. Transpiration profiles and features characterizing these profiles were  
175 obtained from an adapted automated pipeline developed by (Kar *et al.*, 2020). Leaf area  
176 measured at 36 DAS was further used to measure transpiration rate at 35 DAS, assuming  
177 marginal changes in leaf area between 35 and 36 DAS. Averaged transpiration rate for each  
178 genotypes were plotted against time between 9 AM to 4 PM, as a proxy for the evaporative  
179 demand, and the segmented R package v1.2.0 (Muggeo, 2008) was used to calculate the slope  
180 of the initial linear regression and an inflexion point in the transpiration response.

181

## 182 *Data analysis*

183 A non-parametric smoothing approach was used to detect outliers in the time-course shoot  
184 fresh weight and water uptake from the large-scale phenotyping experiment (Millet *et al.*,  
185 2021). This approach uses a *locfit()* function that fits a local regression at a set of points and a  
186 *predict()* function to interpolate this fit to other points. A confidence interval is calculated and  
187 points located outside the interval are considered as outliers.

188 Shoot fresh weight and total water uptake datasets were further analyzed for  
189 detection of plant outliers. For this, a multi-criteria analysis with expert rules function was  
190 used (Millet *et al.*, 2021). Leaf area, shoot fresh weight and plant height were modelled  
191 considering fixed experiment effects, and random genotypic, replicate and spatial effects  
192 using SpATS. A lower and an upper bound interval for the evolution of these traits across the  
193 experiment was created and plants with lesser shoot fresh weight than the lower bound  
194 interval were considered as small outlier plants while plants with greater shoot fresh weight  
195 than the upper bound interval were considered as large outlier plants. These plants were  
196 removed from the dataset.

197 Shoot fresh weight and total water uptake values were finally corrected for spatial  
198 heterogeneity in the PhenoArch greenhouse using the StatgenHTP R package (Millet *et al.*,  
199 2021). This package is based on the previously developed SpATS (Spatial Analysis of Trials  
200 using Splines; Rodríguez-Álvarez *et al.*, 2015) package and separate the genetic effect from  
201 the spatial effect by taking into account the evolution of shoot fresh weight and total water  
202 uptake across time.

203

#### 204 *Genome wide association studies*

205 The *O. glaberrima* panel used in this study was previously subjected to in-depth re-sequencing  
206 to identify Single Nucleotide Polymorphisms (SNPs) based on mapping to the *O. sativa*  
207 *japonica* cv. Nipponbare reference genome MSU7 (Cubry *et al.*, 2018). A total of 892,539 SNPs  
208 was identified for this panel with a genome-wide high linkage disequilibrium at short distance  
209 (0.2 for at least 150 kb) that slowly decayed (Cubry *et al.*, 2020). Missing data remaining in the  
210 SNP matrix (less than 5% of missing data per SNP) were imputed using the *impute* function of  
211 the LEA R package v3.1.0 (Frichot and François, 2015; Gain and François, 2021).

212 Association between genomic polymorphisms and mean phenotypic variables were  
213 performed using a pipeline described in Cubry *et al.* (2020). In this pipeline, SNPs displaying a  
214 minimal allele frequency (frequency of the minor allele) lower than 5% are filtered out. A  
215 simple non-corrected linear model (analysis of variance, ANOVA) was performed to assess the  
216 effect of confounding factors such as relatedness and population structure on false positive  
217 rates. Two genome-wide association methods were further used: (1) a latent factor mixed  
218 model as implemented in the LFMM v2 R package that jointly estimated associations between  
219 genotype and phenotype and confounding factors (Frichot *et al.*, 2013); and (2) an efficient  
220 mixed model analysis (EMMA) as implemented in the EMMA R package (Kang *et al.*, 2008).  
221 Population structure was corrected using four latent factors in the LFMM model and a  
222 similarity-based kinship matrix in the EMMA model (Cubry *et al.*, 2020). The results of all  
223 analyses were graphically represented as Manhattan plots and QQ-plot to assess efficiency of  
224 confounding factors correction using the qqman R package v0.1.4 (Turner, 2018). A *p*-value  
225 threshold of  $10^{-5}$  was used to select significant SNPs. Candidate genes were selected in a 150kb  
226 region upstream and downstream of the significant SNPs by intersecting the region with the  
227 MSU7 genome annotation (Kawahara *et al.*, 2013).

228

#### 229 *Statistical analyses*

230 Statistical analyses were performed with R version 4.0.2 (R Development Core Team, 2018)  
231 using ANOVA (aov function) to detect genotypic and environmental effects. To determine to  
232 which extent the measured traits were genetically determined, broad-sense heritability ( $H^2$ )  
233 was calculated according to (Oakey *et al.*, 2006) using the *inti* R package v0.4.3 (Lozano-Isla,  
234 2021) according to the following formula:



235 
$$H_{Cullis}^2 = 1 - \frac{v_{\Delta}^{-BLUP}}{2 * \sigma_g^2}$$

236 where  $\sigma^2$  refers to the variance,  $g$  to the genotype,  $v_{\Delta}^{-BLUP}$  to the average standard error of the  
237 genotypic best linear unbiased prediction (BLUP).

238

## 239 **Results**

### 240 ***Water-use related traits are highly variable and heritable in African rice***

241 In order to measure variation in water-use related traits in *O. glaberrima*, 147 genotypes from  
242 a diversity panel were grown in the INRAE-PhenoArch high-throughput phenotyping platform  
243 where shoot growth and water uptake were monitored daily by imaging and pots weighing  
244 from 17 to 29 DAS. These data were used to calculate plant leaf area, water uptake,  
245 transpiration rate and shoot fresh weight during the course of the experiment. Moreover,  
246 shoot fresh weight was measured at the end of the experiment (29 DAS). Shoot biomass  
247 accumulation over time was accompanied by an increase in water uptake and better  
248 discrimination between genotypes (Fig. 1A and B). Large genotypic variation in shoot fresh  
249 weight and total water uptake was observed at 29 DAS (coefficient of variation of 31.68 % and  
250 10.17 %, respectively; Table 1). Transpiration efficiency (TE) calculated from shoot fresh  
251 weight and total water uptake at 29 DAS ranged from 1.82 to 11.35 and showed a coefficient  
252 of variation of 23.89 % (Table 1 and Fig. 1C). Residuals representing the genotype-specific  
253 deviation from the least squares linear regression between total water uptake and shoot fresh  
254 weight measured at 29 DAS were calculated and named TEr (Supplementary Fig. S2). TEr  
255 represents the genotype-specific component of shoot biomass that is independent of water  
256 uptake or, in other words, the difference of shoot biomass produced for the same amount of  
257 water consumed. TEr varied from -5.24 to 3.34 in the panel (Table 1). Except for transpiration  
258 rate, all traits were subjected to significant genotypic effect resulting in high heritability (> 0.9  
259 for shoot fresh weight, total water uptake and TE and 0.7 for TEr; Supplementary Tables S1,  
260 S2, S3, S4, S5 and Supplementary Fig. S3, S4, S5, S6, S7).

261 In order to check the repeatability of the traits measured in the large-scale  
262 phenotyping experiment, a subset of ten genotypes contrasting for shoot fresh weight, total  
263 water uptake and TE were selected and grown in the small-scale experiment for

264 measurements of the same variables at 36 DAS. Genotypes Og\_118, Og\_12, Og\_162, Og\_61  
265 and Og\_62 had low shoot fresh weight, total water uptake and TE while genotypes Og\_15,  
266 Og\_184, Og\_185, Og\_408 and Og\_43 had high shoot fresh weight and total water uptake and  
267 TE (Supplementary Fig. S8). Shoot fresh weight and total water uptake were significantly  
268 positively correlated ( $p$ -value  $< 0.01$ ) between the two experiments showing their robustness  
269 between environments (Supplementary Fig. S9). Similarly, significant correlations between TE  
270 measured in the large-scale and small-scale experiments were observed (Fig. 1D).

271 Since transpiration response to increasing evaporative demand contributes to  
272 modulate TE, we calculated the slope of the regression between transpiration rate and  
273 maximum reference evapotranspiration at 23, 25, 26, 27 and 28 DAS in the large-scale  
274 experiment (Supplementary Fig. S10). The slope of the linear regression (SlopeTR) represents  
275 the transpiration response to increasing evaporative demand and reads as follows: the lower  
276 the slope, the lower the genotype responds to the evaporative demand by restricting its  
277 transpiration. SlopeTR showed a coefficient of variation of 34.71 % in the population and a  
278 broad-sense heritability of 0.42 (Table 1 and Supplementary Fig. S11).

279 Overall, our data show that water use-related traits were variable and highly heritable  
280 in the *O. glaberrima* panel. These variations appeared to be conserved in a subset of  
281 genotypes across environments.

282

### 283 ***Transpiration restriction under high evaporative demand contributes to increased TE in*** 284 ***African rice***

285 To better understand the relationship between the different water use-related traits, we  
286 performed correlation analyses between each trait measured in the *O. glaberrima* panel. A  
287 significant positive correlation was observed between shoot fresh weight (SFW) and total  
288 water uptake (TWU;  $p$ -value  $< 0.001$ ; Fig. 2A) indicating that plants that grew a bigger biomass  
289 used more water. Similarly, a positive significant correlation was observed between TE and  
290 both shoot fresh weight and total water uptake ( $p$ -value  $< 0.001$ ). On the other hand, TEr was  
291 correlated with TE ( $R = 0.73$ ) and less so with shoot fresh weight and total water uptake,  
292 although all correlations were significant ( $p$ -value  $< 0.001$ ; Fig. 2A). Interestingly, a significant

293 negative correlation was observed between TE and transpiration response to evaporative  
294 demand (SlopeTR; Fig. 2B), suggesting that genotypes with lower transpiration at higher  
295 evaporative demand had higher TE. This indicates that transpiration restriction under high  
296 evaporative demand might contribute to increased TE in African rice.

297 To test this hypothesis, we studied the transpiration response to VPD across one day  
298 in the same subset of contrasted genotypes as above at 35 DAS. During this experiment, VPD  
299 gradually increased to reach its maximum around 5 PM and further decreased (Fig. 3A).  
300 Transpiration rate followed the same pattern until 4 PM where it reached its maximum for  
301 most of the genotypes and further decreased (Fig. 3A). Large variation in the transpiration  
302 response to VPD was observed among genotypes, with Og\_185 and Og\_118 having the lowest  
303 and highest maximum transpiration rate at 4 PM (Fig. 3A). To further quantify this response,  
304 we measured the slope of transpiration response to increasing VPD and the time of  
305 transpiration inflexion between 10 AM to 4:30 PM (Supplementary Fig. S12). While the  
306 inflexion time did not significantly vary among genotypes, significant differences were  
307 observed in the slope of transpiration response (SlopeTR;  $p$ -value < 0.01; Supplementary Table  
308 S7). Principal component analyses showed that the first principal component that separated  
309 the genotypes with low shoot fresh weight from those with high shoot fresh weight accounted  
310 for 73.3 % of the global variation (Fig. 3B). Genotypes with low shoot fresh weight covaried  
311 with transpiration rate and transpiration response to evaporative demand (SlopeTR) while  
312 genotypes with higher shoot fresh weight covaried with root dry weight, total water uptake  
313 and TE (Fig. 3B). Transpiration response to evaporative demand (SlopeTR) was significantly  
314 negatively correlated with shoot fresh weight ( $p$ -value < 0.05), total water uptake ( $p$ -value <  
315 0.01) and TE ( $p$ -value < 0.05; Fig. 3C and Supplementary Fig. S13). Interestingly, the ratio of  
316 root to shoot dry weight (Root:Shoot ratio) was significantly positively correlated with  
317 transpiration response to evaporative demand (SlopeTR;  $p$ -value < 0.05; Fig. 3D) and tended  
318 to covary with transpiration rate ( $R = 0.4$ ), although this covariation was not significant  
319 (Supplementary Fig. S13).

320 Altogether, precise measurements of transpiration under increasing evaporative  
321 demand in the subset of genotypes confirmed that transpiration restriction to increasing

322 evaporative demand (lower SlopeTR) was associated with higher TE in African rice. Our results  
323 further demonstrated that shoot biomass and the balance between roots and shoots growth  
324 played important roles in the transpiration response to increasing evaporative demand.

325

### 326 ***Identification of genomic regions associated with water use-related traits by association*** 327 ***genetics***

328 As our data showed that water use-related traits were variable and highly heritable in the *O.*  
329 *glaberrima* panel, we performed association genetics to identify polymorphisms associated  
330 with their variation. Genomic regions associated with shoot fresh weight, total water uptake,  
331 TE, its residuals T<sub>Er</sub> and transpiration response to increasing evaporative demand (SlopeTR)  
332 were identified using two GWAS methods (LFMM and EMMA). Applying a 10<sup>-5</sup> *p*-value  
333 threshold, we observed a total of 42, 59, 49, 95 and 29 significant marker-trait associations in  
334 both methods for shoot fresh weight, total water uptake, TE, T<sub>Er</sub> and transpiration response  
335 to evaporative demand (SlopeTR), respectively (Fig. 4A–D and 5A, Supplementary Fig. S14A–D  
336 and S14A). The two methods allowed an efficient correction for false positives linked to  
337 genetic structure (QQ-plots, Fig. 4E–F and 5B, Supplementary Fig. S14E–F and S15B).

338 Significant associations were observed for shoot fresh weight and TE on chromosome  
339 5, and for shoot fresh weight and total water uptake on chromosome 6 using both LFMM and  
340 EMMA methods (Fig. 4 and Supplementary Fig. S14). Further significant associations were  
341 observed with LFMM on chromosome 1 for total water uptake ( $-\log_{10}(p\text{-value}) = 4.63$  in  
342 EMMA; Fig. 4B and Supplementary Fig. S14B) and on chromosome 7 for TE ( $-\log_{10}(p\text{-value}) =$   
343  $3.89$  in EMMA; Fig. 4C and Supplementary Fig. S14C). Although not significant, similar  
344 associations were observed on chromosome 1 for shoot fresh weight and chromosome 7 for  
345 shoot fresh weight and T<sub>Er</sub> in LFMM (Fig. 4A and D). More specific associations were observed  
346 for T<sub>Er</sub> on chromosome 1 in LFMM and EMMA and on chromosome 4 in EMMA ( $-\log_{10}(p\text{-}$   
347  $\text{value}) = 3.73$  in LFMM; Fig. 4D and Supplementary Fig. S14D). For transpiration response to  
348 evaporative demand (SlopeTR), the two most significant associations were observed on  
349 chromosome 2 and 11 in both LFMM and EMMA (Fig. 5A and Supplementary Fig. S15A).

350 Interestingly, the GWAS association located on chromosome 5 position 26971730 for  
351 shoot fresh weight and TE co-localized with a previously reported QTL for early vigor in Asian  
352 rice (*Oryza sativa*; Cui *et al.*, 2002). Two alleles were present for the corresponding SNP with  
353 plants carrying either an adenine (A; 45.5 % of the panel) or a guanidine (G; 54.5 % of the  
354 panel), with plants carrying the G allele having a 25.2 % shoot biomass gain (Supplementary  
355 Fig. S16). Genotypes with low shoot fresh weight (Og\_12, Og\_61, Og\_62, Og\_118 and Og\_162)  
356 grown in the small-scale experiment carried the A allele while genotypes with high shoot fresh  
357 weight (Og\_15, Og\_43, Og\_184, Og\_185, Og\_408) carried the G allele (Supplementary Fig. S8),  
358 confirming the allelic distribution observed in the large-scale experiment. Hence, our results  
359 confirmed the importance of this genomic region to control early shoot growth and the  
360 conservation of this QTL in Asian and African rice.

361 Altogether, our association genetics approach identified at least 14 potential genetic  
362 regions associated with water use related-traits in African rice, some of which are specific to  
363 TE, TEr or transpiration response to evaporative demand.

364

365 ***Genes potentially involved in photosynthesis, regulation of water transport and drought***  
366 ***responses are underlying associations for water use-related traits***

367 We next analyzed the genes present in genetic regions associated with shoot fresh weight,  
368 total water uptake, TE, TEr and transpiration response to evaporative demand. Since linkage  
369 disequilibrium is high at short distance then slowly decays to values below 0.2 after around  
370 150 kb in this panel (Cubry *et al.*, 2018, 2020), we considered genes in a 300 kb region  
371 surrounding the most significant SNP at each association peak (Table 2). The most significant  
372 SNP on chromosome 5 position 26971730 associated with shoot fresh weight and TE mapped  
373 in an intergenic region at 1.8 Kb of a gene encoding a Polyprenyl Synthetase and 10.2 Kb of a  
374 gene encoding a Ras-related nuclear protein (RAN) GTPase-activating protein. Polyprenyl  
375 synthetase catalyzes the synthesis of isopentenyl diphosphate that is involved in the  
376 biosynthesis pathway of plastoquinones, essential proteins for the photosynthesis machinery  
377 carrying electrons in the linear and alternative electron chains (Liu *et al.*, 2019; Havaux, 2020).  
378 RAN GTPase are involved in nucleocytoplasmic transport, mitotic progression and membrane  
379 trafficking, cytoskeletal organization or cell polarity, and have important roles in plant growth,  
380 development and response to stress conditions (Nielsen, 2020). In particular, the Arabidopsis

381 *RanBP1c* and wheat *Ran1* are involved in auxin-induced root growth and development  
382 through the control of mitotic progress (Kim *et al.*, 2001; Wang *et al.*, 2006). Heterologous  
383 overexpression of a wheat Ran GTPase in rice reduced the number of lateral roots and induced  
384 hypersensitivity to auxin (Wang *et al.*, 2006).

385 The GWAS peak for total water uptake on chromosome 1 (position 21989359) is  
386 located in an intergenic region at 3.5 kb of a gene coding the C-type C2H2 zinc finger protein  
387 ZOS1-10 (Table 2). C2H2-type zinc finger proteins form a large family of 189 members in rice  
388 (Agarwal *et al.*, 2007) having many roles in plant growth, development, abiotic and biotic  
389 resistances (Han *et al.*, 2020). The rice C2H2 zinc finger protein *Drought and Salt Tolerance*  
390 (*DST*) is for instance involved in leaf morphology and water use through stomatal control, its  
391 loss of function increasing rice and salt tolerance (Huang *et al.*, 2009).

392 The most significant SNP on chromosome 7 associated with TE mapped on the 3' UTR  
393 of a gene coding an unknown protein (LOC\_Os07g26595). A cluster of four Plasma membrane  
394 Intrinsic Proteins (PIPs) primarily expressed in roots are located from 47 to 98 Kb away from  
395 this SNP (Sakurai *et al.*, 2005; Guo *et al.*, 2006). Plasma membrane aquaporins are water  
396 channels located on the plasma membrane and were described as important contributors of  
397 root radial water transport (Grondin *et al.*, 2016) and water use efficiency in rice (Nada and  
398 Abogadallah, 2014). Another interesting gene coding for OsRR7, a type-A response regulator  
399 is located at 130 Kb from this SNP. In Arabidopsis, a type-A response regulator protein ARR5  
400 is phosphorylated by SnRK2s protein and amplifies the ABA-mediated stress response while  
401 inhibiting the cytokinin-responsive genes promoting growth and development (Huang *et al.*,  
402 2018). In maize, a recent report demonstrated that natural variation in type-A response  
403 regulator confers chilling tolerance (Zeng *et al.*, 2021).

404 The GWAS associations for T<sub>Er</sub> and transpiration response to evaporative demand on  
405 chromosome 1 (position 9237408 and 8982662, respectively) mapped in intergenic regions  
406 near a gene homologous to the *SUPER APICAL DOMINANT (SAD1)* gene encoding an ortholog  
407 of the polymerase 1 subunit RPA34.5 that plays important roles in shoot and root  
408 development in rice (Li *et al.*, 2015). Another gene coding for a heterotrimeric G $\beta$  protein  
409 potentially involved in the control of cell expansion via interaction with lipid metabolic

410 pathways was identified in the region (Choudhury *et al.*, 2019). Two genes encoding a TCP  
411 transcription factor and a glycosyltransferase were located at around 48 Kb upstream and  
412 downstream of the most significant SNP associated with T<sub>E</sub>r in EMMA on chromosome 4. *TCP*  
413 (*THEOSINTE BRANCHED1\_CYCLOIDEA\_PROLIFERATING CELL FACTOR1*) genes are involved in  
414 leaf shape in Arabidopsis (Koyama *et al.*, 2010) and improved agronomic traits when  
415 overexpressed in rice (Li *et al.*, 2020) while glycosyltransferase mediates the biosynthesis of  
416 prominent hemicellulose xylan (an important component of primary and secondary cell walls)  
417 in rice (Anders *et al.*, 2012; Lin *et al.*, 2016).

418 The most significant SNP on chromosome 2 (position 23902475) for transpiration  
419 response to evaporative demand is located at 9.5 Kb from a gene encoding a C2H2 zinc finger  
420 protein and 8 Kb from a gene encoding a GDSL-like lipase/acylhydrolase. The rice GDSL  
421 *BRITTLE LEAF SHEATH1 (BS1)* gene was reported to play an important role in the maintenance  
422 of proper acetylation level on the xylan backbone (Zhang *et al.*, 2017). In particular, BS1 affects  
423 secondary cell wall pattern in vessels, the *bs1* mutant having larger metaxylem pit size and  
424 reduced agronomical performances (Zhang *et al.*, 2017).

425

## 426 Discussion

427 In this study, 147 *O. glaberrima* genotypes were phenotyped in a high-throughput  
428 phenotyping platform for shoot growth and water uptake dynamics at early vegetative stage.  
429 Image-based monitoring of shoot traits (fresh weight and leaf area) and gravimetric  
430 monitoring of water loss allowed us to measure daily transpiration rate and TE at 29 DAS.  
431 Strong positive and significant correlations were observed between shoot fresh weight, total  
432 water uptake and TE in our study. Our results on *O. glaberrima* are in line with what was  
433 observed in foxtail millet (Feldman *et al.*, 2018) and contradict previous claims that high water  
434 use efficiency is related to low productivity (Condon *et al.*, 2002; Blum, 2009). In sorghum or  
435 pearl millet no correlation was found between TE and shoot biomass or total water use (Vadez  
436 *et al.*, 2011, 2013). In fact, it appears that TE is not necessarily related to total water use or  
437 shoot growth, and the relationship between these variables depends on the species, the  
438 environments or the way water use efficiency is measured (for extensive review see Vadez *et*

439 *al.*, 2014). In our experimental conditions at least, it appears that larger and more vigorous *O.*  
440 *glaberrima* plants consume more water from the soil, but are relatively more efficient at  
441 producing biomass from that amount of water consumed. Interestingly, a significant negative  
442 correlation was observed between TE and transpiration rate, indicating that, although water  
443 loss by transpiration is higher in larger plants, transpiration per unit of leaf surface at the  
444 whole plant level is lower. We also measured the residuals of TE (TE<sub>r</sub>) that correspond in our  
445 study to the genotype-specific deviation from the relationship between biomass and water  
446 use, with genotypes deviating above the relationship being more efficient at using water than  
447 those deviating below the relationship. TE<sub>r</sub> was also significantly negatively correlated with  
448 transpiration rate, although the correlation coefficient was lower. These intriguing results  
449 suggest a stomatal regulation of transpiration rate in *O. glaberrima* genotypes with higher TE.  
450 We hypothesized that this regulation was linked to a transpiration restriction strategy in  
451 response to increasing evaporative demand.

452         To study the links between transpiration efficiency and transpiration response to  
453 increasing evaporative demand, we took a similar approach than Alvarez Prado *et al.* (2017)  
454 consisting in plotting daily transpiration rate with maximum reference evapotranspiration.  
455 Due to environmental conditions in the high-throughput experiment, the range of maximum  
456 evapotranspiration remained relatively low during the experiment (from 1.1 to 1.23). Still, the  
457 slope of this relationship was considered as a proxy of transpiration response to increasing  
458 evaporative demand. It was highly variable in *O. glaberrima* and under genetic control as  
459 illustrated by high broad-sense heritability. Interestingly, we observed a significant negative  
460 correlation between TE (and TE<sub>r</sub> to a lower extent) and transpiration response to increasing  
461 evaporative demand. These transpiration responses and correlations were further confirmed  
462 in a subset of genotypes where transpiration responses to much larger variation in  
463 evaporative demand (from 1.5 to 3.7) were precisely measured. Altogether, these results  
464 indicate that transpiration restriction in conditions of high evaporative demand was linked to  
465 improved TE in African rice. Transpiration response to evaporative demand is regarded as an  
466 important component trait of water use efficiency, particularly for crops growing in arid and  
467 drought-prone areas (Vadez *et al.*, 2014; Shekoofa and Sinclair, 2018). In pearl millet, reducing



468 transpiration when the evaporative demand exceeds a certain threshold allowed water  
469 conservation during the vegetative growth that could be used at reproductive stage for better  
470 yield (Vadez *et al.*, 2013). Early vigor accompanied by increased TE through transpiration  
471 restriction strategies may be particularly advantageous for upland rice genotypes growing in  
472 rainfed agroecosystems, especially when competing against weeds or under the occurrence  
473 of a drought stress.

474 Exhaustive measurements of transpiration profile under changing temperature and  
475 relative humidity over the course of the day allowing precise measurement of the  
476 transpiration restriction phenotype has often been low throughput (Gholipoor *et al.*, 2010,  
477 2013; Jyostna Devi *et al.*, 2010; Jauregui *et al.*, 2018). To our knowledge, our study is pioneer  
478 in reporting measurements of transpiration restriction in a crop at a throughput compatible  
479 with association genetic analyses. Recent development of an imaging platform combined with  
480 lysimetric capacity allowing monitoring of transpiration response to high VPD in natural  
481 conditions (Vadez *et al.*, 2015) and automation of transpiration profile features generation  
482 (Kar *et al.*, 2020) will be instrumental for high-throughput phenotyping of plant water use-  
483 related traits and identification of their genetic determinants with breeding perspectives.

484 Roots are the primary sites of water uptake and play important roles in maintaining  
485 whole plant water status, balancing water acquisition and water flow to match shoot water  
486 demand (Maurel *et al.*, 2010; Vadez, 2014). Root traits controlling radial root conductance  
487 including aquaporin functions (Reddy *et al.*, 2017; Sivasakthi *et al.*, 2017, 2020; Grondin *et al.*,  
488 2020) or apoplastic barriers (Calvo-Polanco *et al.*, 2021; Reyt *et al.*, 2021) as well as those  
489 controlling root axial conductance including metaxylem diameter (Richards and Passioura,  
490 1989) have been linked to water balance and plant transpiration efficiency in several crops. In  
491 this study, we observed a positive significant correlation between root to shoot ratio and  
492 transpiration response to increasing evaporative demand. Assuming that root dry weight is  
493 largely related to root surface, these results indicate that the balance between root and shoot  
494 surfaces are important for transpiration response to increasing evaporative demand. Plants  
495 with larger root surface as compared to shoot surface appeared less sensitive to the increase  
496 in evaporative demand, possibly due to the ability of the root system to maintain water

497 acquisition in response to the increased water demands by the shoots. Our results therefore  
498 suggest that decreased carbon allocation towards the roots, and possibly decreased root  
499 surface may be beneficial for the transpiration restriction phenotype. Further investigations  
500 are needed to determine the contribution of root architectural, anatomical or physiological  
501 traits in the transpiration restriction phenotype and how these relate to drought tolerance in  
502 *O. glaberrima*.

503 Interestingly, our GWAS approach confirmed the importance of roots in the control of  
504 TE and transpiration response to increasing evaporative demand. Indeed, we identified  
505 several genetic regions associated with these traits that contain genes potentially involved in  
506 root development or water transport. In particular, a cluster of aquaporin genes was located  
507 near the association for TE observed on chromosome 7, amongst which LOC\_Os07g26660  
508 appears root-specific. These genes encode type-2 Plasma membrane Intrinsic Proteins that  
509 are known to play important roles in root radial water transport. Their expressions have also  
510 been associated with the control of TE and transpiration restriction as they may quickly  
511 regulate root water flow to respond, or not, to changes in transpiration when the evaporative  
512 demand is increasing (Shekoofa and Sinclair, 2018). Aquaporins function also have important  
513 roles in root and shoot growth coordination (Ehlert *et al.*, 2009; Maurel *et al.*, 2010). In fact,  
514 this GWAS association on chromosome 7 was also found for shoot fresh weight, although just  
515 below the significance threshold.

516 A strong marker-trait association for TE and shoot fresh weight at 29 DAS was located  
517 on chromosome 5. This association collocated with a known QTL for early vigor identified in  
518 *O. sativa* (Cui *et al.*, 2002). This suggests that this QTL for early vigor is conserved in Asian and  
519 African rice. An interesting candidate gene coding for a polyprenyl synthetase protein  
520 potentially involved in plastoquinone biosynthesis and more generally in photosynthesis was  
521 located close to the most significant SNP. This suggest that a more efficient photosynthetic  
522 machinery might be responsible for increased early vigor. Further work will be needed to test  
523 this exciting hypothesis.

524 T<sub>Er</sub> and transpiration response to increasing evaporative demand shared an  
525 association on chromosome 1 where a candidate gene involved in cell wall biosynthesis was

526 identified. This result confirms the links between these two traits and support the hypothesis  
527 that transpiration restriction is an important component of TE in *O. glaberrima*. Another  
528 candidate gene encoding a GDSL protein possibly involved in cell wall biosynthesis was  
529 identified in close vicinity of the most significant association on chromosome 2 for  
530 transpiration response to increasing evaporative demand (Zhang *et al.*, 2017). Cell wall  
531 properties potentially play important roles in the apoplastic water path in roots and shoots.  
532 This path, complementary to the symplasmic path (from cell to cell through aquaporins or  
533 plasmodesmata), is supposedly predominant under increasing evaporative demand, i.e. under  
534 conditions where transpiration restriction occurs (Tharanya *et al.*, 2018; Sivasakthi *et al.*,  
535 2020). The effects of cell wall content and mechanical properties on plant water transport  
536 properties have been poorly studied. Simulations using a model coupling water fluxes and cell  
537 wall mechanics recently suggested that heterogeneities in cell wall mechanical parameters in  
538 tissues impacted water flow and growth rate (Cheddadi *et al.*, 2019). Moreover, affecting cell  
539 wall composition had significant effects on xylem vessel wall patterning in rice, which may  
540 further impact axial water flow (Zhang *et al.*, 2017).

541 In conclusion, high-throughput phenotyping of water use-related traits in *O.*  
542 *glaberrima* showed that transpiration restriction under increasing evaporative demand may  
543 be an important strategy to improve TE in *O. glaberrima* rice, which is partly controlled by the  
544 balance between root and shoot growth. The functional mechanisms of such control in terms  
545 of water fluxes are still unknown although association genetics pointed to mechanisms linked  
546 to cell wall composition and patterning.

547

#### 548 **Supplementary data**

549 **Supplementary Table S1:** Analysis of variance for shoot fresh weight (SFW) measured at 29  
550 days after sowing in *O. glaberrima* in the large-scale experiment.

551 **Supplementary Table S2:** Analysis of variance for total water uptake (TWU) measured at 29  
552 days after sowing in *O. glaberrima* in the large-scale experiment.

553 **Supplementary Table S3:** Analysis of variance for transpiration efficiency (TE) measured at 29  
554 days after sowing in *O. glaberrima* in the large-scale experiment.

555 **Supplementary Table S4:** Analysis of variance for residuals of transpiration efficiency (TER)  
556 measured at 29 days after sowing in *O. glaberrima* in the large-scale experiment.

557 **Supplementary Table S5:** Analysis of variance for transpiration rate (TR) measured at 29 days  
558 after sowing in *O. glaberrima* in the large-scale experiment.

559 **Supplementary Table S6:** Analysis of variance for transpiration response to increasing  
560 evaporative demand (SlopeTR) measured in *O. glaberrima* in the large-scale experiment.

561 **Supplementary Table S7:** Transpiration response (SlopeTR) and inflexion in transpiration rate  
562 (InflexionTR) under increasing evaporative demand measured in the subset of *O. glaberrima*  
563 genotypes in the small-scale experiment.

564 **Supplementary Fig. S1.** Regression model used to estimate shoot fresh biomass and leaf area  
565 based on ground truth measurements.

566 **Supplementary Fig. S2:** Residuals of transpiration efficiency.

567 **Supplementary Fig. S3.** Histograms, QQ-plots, and plots of residuals against fitted or index  
568 values for fixed (fix) or random (ran) genotypic effects on shoot fresh weight measured at 29  
569 days after sowing in the large-scale experiment.

570 **Supplementary Fig. S4:** Histograms, QQ-plots, and plots of residuals against fitted or index  
571 values for fixed (fix) or random (ran) genotypic effects on total water uptake measured at 29  
572 days after sowing in the large-scale experiment.

573 **Supplementary Fig. S5:** Histograms, QQ-plots, and plots of residuals against fitted or index  
574 values for fixed (fix) or random (ran) genotypic effects on transpiration efficiency measured at  
575 29 days after sowing in the large-scale experiment.

576 **Supplementary Fig. S6:** Histograms, QQ-plots, and plots of residuals against fitted or index  
577 values for fixed (fix) or random (ran) genotypic effects on residuals of transpiration efficiency  
578 measured at 29 days after sowing in the large-scale experiment.

579 **Supplementary Fig. S7:** Histograms, QQ-plots, and plots of residuals against fitted or index  
580 values for fixed (fix) or random (ran) genotypic effects on transpiration rate measured at 29  
581 days after sowing in the large-scale experiment.

582 **Supplementary Fig. S8:** Water use-related traits in the subset of *O. glaberrima* genotypes.

583 **Supplementary Fig. S9:** Correlation between water use-related traits measured in the large-  
584 scale experiment at 29 days after sowing (PhenoArch) and in the small-scale experiment at 35  
585 days after sowing (Subset).

586 **Supplementary Fig. S10:** Transpiration response to increasing evaporative demand.

587 **Supplementary Fig. S11:** Histograms, QQ-plots, and plots of residuals against fitted or index  
588 values for fixed (fix) or random (ran) genotypic effects on transpiration response to increasing  
589 evaporative demand (SlopeTR) measured in the large-scale experiment.

590 **Supplementary Fig. S12:** Transpiration response to increasing evaporative demand in the  
591 subset of *O. glaberrima* genotypes.

592 **Supplementary Fig. S13:** Correlation between water use-related traits and plant morphology  
593 in a subset of *O. glaberrima* genotypes.

594 **Supplementary Fig. S14:** Genome wide association studies for shoot fresh weight, total water  
595 uptake, transpiration efficiency (TE), and residuals of transpiration efficiency (TEr) in *O.*  
596 *glaberrima*.

597 **Supplementary Fig. S15:** Genome wide association studies for transpiration response to  
598 increasing evaporative demand in *O. glaberrima*.

599 **Supplementary Fig. S16:** Repartition of shoot fresh weight according to the allelic version at  
600 the most significant SNP (Chr5\_26971730) for the GWAS association on chromosome 5.

601

## 602 **Acknowledgments**

603 This work was supported by the Institut de Recherche pour le Développement, the CGIAR  
604 Research Program (CRP) on rice-agrifood systems (RICE, 2017-2022) and the Agence Nationale  
605 de la Recherche (grants ANR-17-MPGA-0011 to VV). Financial support by the Access to  
606 Research Infrastructures activity in the Horizon 2020 Programme of the EU (EPPN<sup>2020</sup> Grant  
607 Agreement 731013) is gratefully acknowledged. PA was supported by a doctoral fellowship  
608 from the French Ministry of Higher Education. BEE was supported by the Centre National de  
609 la Recherche Scientifique et Technologique of Gabon. The authors acknowledge the IRD iTrop  
610 HPC (South Green Platform) at IRD Montpellier for providing HPC resources  
611 (<https://bioinfo.ird.fr> – <http://www.southgreen.fr>). We are also grateful to Harold Chrestin  
612 and Laurence Albar (IRD) for providing seeds of the *O. glaberrima* genotypes, to Gabriel  
613 Quiroga García (CISC, Spain), Romane Le Roy (INRAE, France) and all the PhenoArch staff for  
614 the technical support, to Emilie Millet (Wageningen University, Netherlands) for her kind  
615 support in the PhenoArch data analyses, to all the *Cereal Root Systems* team of UMR DIADE  
616 and to Soumyashree Kar (Indian Institute of Technology, India) for their kind support on the  
617 data analysis of the Phenospex experiment.

618

619 **Author contributions**

620 LCB, CW, AC, PG, AGD, BM, RA, VV, LL, PC and AG designed the study. PA, BEE, DM, MSN, MP,  
621 NL and LCB performed the experiments with help from all co-authors. PA, BEE, MSN, NL, RP,  
622 LCB, VV, LL, PC and AG analysed the data. AG, PC, LL and VV wrote the first draft of the  
623 manuscript that was edited and approved by all co-authors.

624

625 **Data availability**

626 The data supporting the findings of this study are available from the corresponding author  
627 upon request.

628 **References**

629

630 **Agarwal P, Arora R, Ray S, Singh AK, Singh VP, Takatsuji H, Kapoor S, Tyagi AK.** 2007.

631 Genome-wide identification of C2H2 zinc-finger gene family in rice and their phylogeny and  
632 expression analysis. *Plant Molecular Biology* **65**, 467–485.

633 **Alvarez Prado S, Cabrera-Bosquet L, Grau A, Coupel-Ledru A, Millet EJ, Welcker C, Tardieu**  
634 **F.** 2017. Phenomics allows identification of genomic regions affecting maize stomatal  
635 conductance with conditional effects of water deficit and evaporative demand. *Plant Cell*  
636 and Environment **41**, 314–326.

637 **Anders N, Wilkinson MD, Lovegrove A, et al.** 2012. Glycosyl transferases in family 61  
638 mediate arabinofuranosyl transfer onto xylan in grasses. *Proceedings of the National*  
639 *Academy of Sciences of the United States of America* **109**, 989–993.

640 **Blum A.** 2009. Effective use of water (EUW) and not water-use efficiency (WUE) is the target  
641 of crop yield improvement under drought stress. *Field Crops Research* **112**, 119–123.

642 **Brichet N, Fournier C, Turc O, Strauss O, Artzet S, Pradal C, Welcker C, Tardieu F, Cabrera-**  
643 **Bosquet L.** 2017. A robot-assisted imaging pipeline for tracking the growths of maize ear and  
644 silks in a high-throughput phenotyping platform. *Plant Methods* **13**, 1–12.

645 **Cabrera-Bosquet L, Fournier C, Brichet N, Welcker C, Suard B, Tardieu F.** 2016. High-  
646 throughput estimation of incident light, light interception and radiation-use efficiency of  
647 thousands of plants in a phenotyping platform. *New phytologist* **212**, 269–281.

648 **Calvo-Polanco M, Ribeyre Z, Dausat M, et al.** 2021. Physiological roles of Casparian strips  
649 and suberin in the transport of water and solutes. *New Phytologist* **232**, 2295–2307.

650 **Cheddadi I, Génard M, Bertin N, Godin C.** 2019. Coupling water fluxes with cell wall  
651 mechanics in a multicellular model of plant development. *PLoS Computational Biology* **15**, 1–  
652 16.

653 **Chen YS, Lo SF, Sun PK, Lu CA, Ho THD, Yu SM.** 2015. A late embryogenesis abundant  
654 protein HVA1 regulated by an inducible promoter enhances root growth and abiotic stress  
655 tolerance in rice without yield penalty. *Plant Biotechnology Journal* **13**, 105–116.

656 **Choudhary S, Guha A, Kholova J, Pandravada A, Messina CD, Cooper M, Vadez V.** 2020.  
657 Maize, sorghum, and pearl millet have highly contrasting species strategies to adapt to water  
658 stress and climate change-like conditions. *Plant Science* **295**, 110297.

659 **Choudhary S, Sinclair TR.** 2014. Hydraulic conductance differences among sorghum

660 genotypes to explain variation in restricted transpiration rates. *Functional Plant Biology* **41**,  
661 270–275.

662 **Choudhury SR, Marlin MA, Pandey S.** 2019. The role of Gb protein in controlling cell  
663 expansion via potential interaction with lipid metabolic pathways. *Plant Physiology* **179**,  
664 1159–1175.

665 **Condon AG.** 2020. Drying times: Plant traits to improve crop water use efficiency and yield.  
666 *Journal of Experimental Botany* **71**, 2239–2252.

667 **Condon AG, Richards RA, Rebetzke GJ, Farquhar GD.** 2002. Improving intrinsic water-use  
668 efficiency and crop yield. *Crop Science* **42**, 122–131.

669 **Cubry P, Pidon H, Ta KN, et al.** 2020. Genome wide association study pinpoints key  
670 agronomic QTLs in African rice *Oryza glaberrima*. *Rice* **13**, 1–12.

671 **Cubry P, Tranchant-Dubreuil C, Thuillet AC, et al.** 2018. The rise and fall of African rice  
672 cultivation revealed by analysis of 246 new genomes. *Current Biology* **28**, 1–9.

673 **Cui KH, Peng SB, Xing YZ, Xu CG, Yu SB, Zhang Q.** 2002. Molecular dissection of seedling-  
674 vigor and associated physiological traits in rice. *Theoretical and Applied Genetics* **105**, 745–  
675 753.

676 **Ehlert C, Maurel C, Tardieu F, Simonneau T.** 2009. Aquaporin-mediated reduction in maize  
677 root hydraulic conductivity impacts cell turgor and leaf elongation even without changing  
678 transpiration. *Plant Physiology* **150**, 1093–1104.

679 **FAOSTAT.** 2021. Food and Agriculture Organization of the United Nation. Database.  
680 Available at: <http://www.fao.org/faostat/en/#data>.

681 **Feldman MJ, Ellsworth PZ, Fahlgren N, Gehan MA, Cousins AB, Baxter I.** 2018. Components  
682 of water use efficiency have unique genetic signatures in the model C4 grass *Setaria*. *Plant*  
683 *Physiology* **178**, 699–715.

684 **Frichot E, François O.** 2015. LEA: An R package for landscape and ecological association  
685 studies. *Methods in Ecology and Evolution* **6**, 925–929.

686 **Frichot E, Schoville SD, Bouchard G, François O.** 2013. Testing for associations between loci  
687 and environmental gradients using latent factor mixed models. *Molecular Biology and*  
688 *Evolution* **30**, 1687–1699.

689 **Gain C, François O.** 2021. LEA 3: Factor models in population genetics and ecological  
690 genomics with R. *Molecular Ecology Resources* **21**, 2738–2748.

691 **Gholipour M, Choudhary S, Sinclair TR, Messina CD, Cooper M.** 2013. Transpiration



- 692 response of maize hybrids to atmospheric vapour pressure deficit. *Journal of Agronomy and*  
693 *Crop Science* **199**, 155–160.
- 694 **Gholipoor M, Prasad PVV, Mutava RN, Sinclair TR.** 2010. Genetic variability of transpiration  
695 response to vapor pressure deficit among sorghum genotypes. *Field Crops Research* **119**,  
696 85–90.
- 697 **Grondin A, Affortit P, Tranchant-Dubreuil C, de la Fuente-Cantó C, Mariac C, Gantet P,**  
698 **Vadez V, Vigouroux Y, Laplaze L.** 2020. Aquaporins are main contributors to root hydraulic  
699 conductivity in pearl millet [*Pennisetum glaucum* (L) R. Br.]. *Plos One* **15**, e0233481.
- 700 **Grondin A, Mauleon R, Vadez V, Henry A.** 2016. Root aquaporins contribute to whole plant  
701 water fluxes under drought stress in rice (*Oryza sativa* L.). *Plant, Cell and Environment* **39**,  
702 347–65.
- 703 **Guo L, Wang ZY, Lin H, Cui WE, Chen J, Liu M, Chen ZL, Qu LJ, Gu H.** 2006. Expression and  
704 functional analysis of the rice plasma-membrane intrinsic protein gene family. *Cell research*  
705 **16**, 277–86.
- 706 **Han G, Lu C, Guo J, Qiao Z, Sui N, Qiu N, Wang B.** 2020. C2H2 zinc finger proteins: Master  
707 regulators of abiotic stress responses in plants. *Frontiers in Plant Science* **11**, 1–13.
- 708 **Hatfield JL, Dold C.** 2019. Water-use efficiency: Advances and challenges in a changing  
709 climate. *Frontiers in Plant Science* **10**, 1–14.
- 710 **Havaux M.** 2020. Plastoquinone in and beyond photosynthesis. *Trends in Plant Science* **25**,  
711 1252–1265.
- 712 **Huang XY, Chao DY, Gao JP, Zhu MZ, Shi M, Lin HX.** 2009. A previously unknown zinc finger  
713 protein, DST, regulates drought and salt tolerance in rice via stomatal aperture control.  
714 *Genes and Development* **23**, 1805–1817.
- 715 **Huang X, Hou L, Meng J, You H, Li Z, Gong Z, Yang S, Shi Y.** 2018. The antagonistic action of  
716 abscisic acid and cytokinin signaling mediates drought stress response in *Arabidopsis*.  
717 *Molecular Plant* **11**, 970–982.
- 718 **Jauregui I, Rothwell SA, Taylor SH, Parry MAJ, Carmo-Silva E, Dodd IC.** 2018. Whole plant  
719 chamber to examine sensitivity of cereal gas exchange to changes in evaporative demand.  
720 *Plant Methods* **14**, 1–13.
- 721 **Jyostna Devi M, Sinclair TR, Vadez V.** 2010. Genotypic variation in peanut for transpiration  
722 response to vapor pressure deficit. *Crop Science* **50**, 191–196.
- 723 **Kang HM, Zaitlen N a, Wade CM, Kirby A, Heckerman D, Daly MJ, Eskin E.** 2008. Efficient

724 control of population structure in model organism association mapping. *Genetics* **178**, 1709–  
725 1723.

726 **Kar S, Tanaka R, Korbu LB, Kholová J, Iwata H, Durbha SS, Adinarayana J, Vadez V.** 2020.  
727 Automated discretization of ‘transpiration restriction to increasing VPD’ features from  
728 outdoors high-throughput phenotyping data. *Plant Methods* **16**, 1–20.

729 **Karaba A, Dixit S, Greco R, Aharoni A, Trijatmiko KR, Marsch-Martinez N, Krishnan A,**  
730 **Nataraja KN, Udayakumar M, Pereira A.** 2007. Improvement of water use efficiency in rice  
731 by expression of *HARDY*, an *Arabidopsis* drought and salt tolerance gene. Proceedings of the  
732 National Academy of Sciences of the United States of America **104**, 15270–15275.

733 **Kawahara Y, Bastide M De, Hamilton JP, et al.** 2013. Improvement of the *Oryza sativa*  
734 Nipponbare reference genome using next generation sequence and optical map data. *Rice* **6**,  
735 1–10.

736 **Kholová J, Hash CT, Kumar PL, Yadav RS, Kocová M, Vadez V.** 2010. Terminal drought-  
737 tolerant pearl millet [*Pennisetum glaucum* (L.) R. Br.] have high leaf ABA and limit  
738 transpiration at high vapour pressure deficit. *Journal of experimental botany* **61**, 1431–40.

739 **Kholová J, Nepolean T, Tom Hash C, Supriya A, Rajaram V, Senthilvel S, Kakkera A, Yadav R,**  
740 **Vadez V.** 2012. Water saving traits co-map with a major terminal drought tolerance  
741 quantitative trait locus in pearl millet [*Pennisetum glaucum* (L.) R. Br.]. *Molecular Breeding*  
742 **30**, 1337–1353.

743 **Kim SH, Arnold D, Lloyd A, Roux SJ.** 2001. Antisense expression of an *Arabidopsis* Ran  
744 binding protein renders transgenic roots hypersensitive to auxin and alters auxin-induced  
745 root growth and development by arresting mitotic progress. *Plant Cell* **13**, 2619–2630.

746 **Koyama T, Mitsuda N, Seki M, Shinozaki K, Ohme-Takagi M.** 2010. TCP transcription factors  
747 regulate the activities of ASYMMETRIC LEAVES1 and miR164, as well as the auxin response,  
748 during differentiation of leaves in *Arabidopsis*. *Plant Cell* **22**, 3574–3588.

749 **Krishnamurthy L, Upadhyaya HD, Kashiwagi J, Purushothaman R, Dwivedi SL, Vadez V.**  
750 2016. Variation in drought-tolerance components and their interrelationships in the  
751 minicore collection of finger millet germplasm. *Crop Science* **56**, 1914–1926.

752 **Leakey ADB, Ferguson JN, Pignou CP, Wu A, Jin Z, Hammer GL, Lobell DB.** 2019. Water use  
753 efficiency as a constraint and target for improving the resilience and productivity of C3 and  
754 C4 crops. *Annual Review of Plant Biology* **70**, 781–808.

755 **Li W, Chen G, Xiao G, Zhu S, Zhou N, Zhu P, Zhang Q, Hu T.** 2020. Overexpression of TCP

756 transcription factor OsPCF7 improves agronomic trait in rice. *Molecular Breeding* **40**, 1–13.

757 **Li W, Yoshida A, Takahashi M, Maekawa M, Kojima M, Sakakibara H, Kyojuka J.** 2015.

758 SAD1, an RNA polymerase I subunit A34.5 of rice, interacts with Mediator and controls

759 various aspects of plant development. *Plant Journal* **81**, 282–291.

760 **Lin F, Manisseri C, Fagerström A, et al.** 2016. Cell wall composition and candidate

761 biosynthesis gene expression during rice development. *Plant and Cell Physiology* **57**, 2058–

762 2075.

763 **Liu M, Ma Y, Du Q, Hou X, Wang M, Lu S.** 2019. Functional analysis of polyprenyl

764 diphosphate synthase genes involved in plastoquinone and ubiquinone biosynthesis in *salvia*

765 *miltiorrhiza*. *Frontiers in Plant Science* **10**, 1–16.

766 **Lo SF, Ho THD, Liu YL, et al.** 2017. Ectopic expression of specific GA2 oxidase mutants

767 promotes yield and stress tolerance in rice. *Plant Biotechnology Journal* **15**, 850–864.

768 **Lozano-Isla F.** 2021. inti: tools and statistical procedures in plant science. R package version

769 0.4.3, <https://CRAN.R-project.org/package=inti>.

770 **Maurel C, Simonneau T, Sutka M.** 2010. The significance of roots as hydraulic rheostats.

771 *Journal of Experimental Botany* **61**, 3191–3198.

772 **Medina S, Vicente R, Nieto-Taladriz MT, Aparicio N, Chairi F, Vergara-Diaz O, Araus JL.**

773 2019. The plant-transpiration response to vapor pressure deficit (VPD) in durum wheat is

774 associated with differential yield performance and specific expression of genes involved in

775 primary metabolism and water transport. *Frontiers in Plant Science* **9**, 1–19.

776 **Millet EJ, Rodriguez Alvarez MX, Perez Valencia DM, Sanchez I, Hilgert N, van Rossum B-J.**

777 2021. StatgenHTP: High throughout phenotyping (HTP) data analysis. R package version

778 1.0.5, <https://CRAN.R-project.org/package=statgenHTP>.

779 **Muggeo VMR.** 2008. segmented: an R package to fit regression models with broken-line

780 relationships. R package version 1.2.0, <https://cran.r-project.org/doc/Rnews/>.

781 **Nada RM, Abogadallah GM.** 2014. Aquaporins are major determinants of water use

782 efficiency of rice plants in the field. *Plant science : an international journal of experimental*

783 *plant biology* **227**, 165–80.

784 **Nielsen E.** 2020. The small GTPase superfamily in plants: A conserved regulatory module

785 with novel functions. *Annual Review of Plant Biology* **71**, 247–272.

786 **Oakey H, Verbyla A, Pitchford W, Cullis B, Kuchel H.** 2006. Joint modeling of additive and

787 non-additive genetic line effects in single field trials. *Theoretical and Applied Genetics* **113**,

- 788 809–819.
- 789 **van Oort PAJ, Zwart SJ.** 2018. Impacts of climate change on rice production in Africa and  
790 causes of simulated yield changes. *Global Change Biology* **24**, 1029–1045.
- 791 **Ouyang W, Struik PC, Yin X, Yang J.** 2017. Stomatal conductance, mesophyll conductance,  
792 and transpiration efficiency in relation to leaf anatomy in rice and wheat genotypes under  
793 drought. *Journal of Experimental Botany* **68**, 5191–5205.
- 794 **Reddy PS, Tharanya M, Sivasakthi K, Srikanth M, Hash CT, Kholova J, Sharma KK, Vadez V.**  
795 2017. Molecular cloning and expression analysis of Aquaporin genes in pearl millet  
796 [*Pennisetum glaucum* (L) R. Br.] genotypes contrasting in their transpiration response to high  
797 vapour pressure deficits. *Plant Science* **265**, 167–176.
- 798 **Reyt G, Ramakrishna P, Salas-González I, et al.** 2021. Two chemically distinct root lignin  
799 barriers control solute and water balance. *Nature Communications* **12**, 1–15.
- 800 **Richards RA, Passioura JB.** 1989. A breeding program to reduce the diameter of the major  
801 xylem vessel in the seminal roots of wheat and its effect on grain yield in rain-fed  
802 environments. *Australian Journal of Agricultural Research* **40**, 943–950.
- 803 **Rodríguez-Álvarez MX, Lee DJ, Kneib T, Durbán M, Eilers P.** 2015. Fast smoothing parameter  
804 separation in multidimensional generalized P-splines: the SAP algorithm. *Statistics and*  
805 *Computing* **25**, 941–957.
- 806 **Sakurai J, Ishikawa F, Yamaguchi T, Uemura M, Maeshima M.** 2005. Identification of 33 rice  
807 aquaporin genes and analysis of their expression and function. *Plant and Cell Physiology* **46**,  
808 1568–1577.
- 809 **Shekoofa A, Sinclair T.** 2018. Aquaporin activity to improve crop drought tolerance. *Cells* **7**,  
810 1–10.
- 811 **Shen H, Zhong X, Zhao F, et al.** 2015. Overexpression of receptor-like kinase ERECTA  
812 improves thermotolerance in rice and tomato. *Nature Biotechnology* **33**, 996–1003.
- 813 **Sinclair TR, Devi J, Shekoofa A, Choudhary S, Sadok W, Vadez V, Riar M, Rufty T.** 2017.  
814 Limited-transpiration response to high vapor pressure deficit in crop species. *Plant Science*  
815 **260**, 109–118.
- 816 **Sivasakthi K, Tharanya M, Kholová J, Wangari Muriuki R, Thirunalasundari T, Vadez V.**  
817 2017. Chickpea genotypes contrasting for vigor and canopy conductance also differ in their  
818 dependence on different water transport pathways. *Frontiers in Plant Science* **8**, 1–16.
- 819 **Sivasakthi K, Tharanya M, Zaman-Allah M, Kholová J, Thirunalasundari T, Vadez V.** 2020.

820 Transpiration difference under high evaporative demand in chickpea (*Cicer arietinum* L.) may  
821 be explained by differences in the water transport pathway in the root cylinder. *Plant*  
822 *Biology* **22**, 769–780.

823 **Tharanya M, Sivasakthi K, Barzana G, Kholová J, Thirunalasundari T, Vadez V.** 2018. Pearl  
824 millet (*Pennisetum glaucum*) contrasting for the transpiration response to vapour pressure  
825 deficit also differ in their dependence on the symplastic and apoplastic water transport  
826 pathways. *Functional Plant Biology* **45**, 719–736.

827 **This D, Comstock J, Courtois B, Xu Y, Ahmadi N, Vonhof WM, Fleet C, Setter T, McCouch S.**  
828 2010. Genetic analysis of water use efficiency in rice (*Oryza sativa* L.) at the leaf level. *Rice* **3**,  
829 72–86.

830 **Turner SD.** 2018. qqman: an R package for visualizing GWAS results using Q-Q and  
831 manhattan plots. *Journal of Open Source Software* **3**, 731.

832 **Vadez V.** 2014. Root hydraulics: The forgotten side of roots in drought adaptation. *Field*  
833 *Crops Research* **165**, 15–24.

834 **Vadez V, Kholová J, Hummel G, Zhokhavets U, Gupta SK, Hash CT.** 2015. LeasyScan: A novel  
835 concept combining 3D imaging and lysimetry for high-throughput phenotyping of traits  
836 controlling plant water budget. *Journal of Experimental Botany* **66**, 5581–5593.

837 **Vadez V, Kholova J, Medina S, Kakker A, Anderberg H.** 2014. Transpiration efficiency: New  
838 insights into an old story. *Journal of Experimental Botany* **65**, 6141–6153.

839 **Vadez V, Kholová J, Yadav RS, Hash CT.** 2013. Small temporal differences in water uptake  
840 among varieties of pearl millet (*Pennisetum glaucum* (L.) R. Br.) are critical for grain yield  
841 under terminal drought. *Plant and Soil* **371**, 447–462.

842 **Vadez V, Krishnamurthy L, Hash CT, Upadhyaya HD, Borrell AK.** 2011. Yield, transpiration  
843 efficiency, and water-use variations and their interrelationships in the sorghum reference  
844 collection. *Crop and Pasture Science* **62**, 645–655.

845 **Vadez V, Ratnakumar P.** 2016. High transpiration efficiency increases pod yield under  
846 intermittent drought in dry and hot atmospheric conditions but less so under wetter and  
847 cooler conditions in groundnut (*Arachis hypogaea* (L.)). *Field Crops Research* **193**, 16–23.

848 **Vasseur F, Bontpart T, Dauzat M, Granier C, Vile D.** 2014. Multivariate genetic analysis of  
849 plant responses to water deficit and high temperature revealed contrasting adaptive  
850 strategies. *Journal of Experimental Botany* **65**, 6457–6469.

851 **Wang X, Xu Y, Han Y, Bao S, Du J, Yuan M, Xu Z, Chong K.** 2006. Overexpression of *RAN1* in

852 rice and *Arabidopsis* alters primordial meristem, mitotic progress, sensitivity to auxin. *Plant*  
853 *Physiology* **140**, 91–101.

854 **Wang M, Yu Y, Haberer G, et al.** 2014. The genome sequence of African rice (*Oryza*  
855 *glaberrima*) and evidence for independent domestication. *Nature Genetics* **46**, 982–988.

856 **Zeng R, Li Z, Shi Y, Fu D, Yin P, Cheng J, Jiang C, Yang S.** 2021. Natural variation in a type-A  
857 response regulator confers maize chilling tolerance. *Nature Communications* **12**, 1–13.

858 **Zhang B, Zhang L, Li F, Zhang D, Liu X, Wang H, Xu Z, Chu C, Zhou Y.** 2017. Control of  
859 secondary cell wall patterning involves xylan deacetylation by a GDSL esterase. *Nature Plants*  
860 **3**, 1–9.

861 **Zotarelli L, Dukes MD, Romero CC, Migliaccio KW, Morgan KT.** 2014. Step by Step  
862 Calculation of the Penman-Monteith Evapotranspiration (*FAO-56 Method*).

863

864 **Tables**

865 **Table 1: Variation of water-use related traits in the *O. glaberrima* panel.** Range, mean,  
866 standard deviation (SD), coefficient of variation (CV) and broad-sense heritability ( $H^2$ ) for  
867 shoot fresh weight, total water uptake, transpiration efficiency and residuals of transpiration  
868 efficiency were measured at 29 days after sowing. Transpiration rate was plotted against  
869 maximum reference evapotranspiration at 23, 25, 26, 27 and 28 days after sowing and the  
870 slope of the corresponding linear regression was used to estimate transpiration response to  
871 evaporative demand (SlopeTR).

| Trait   | Description                                                          | Range          | Mean   | SD    | CV     | $H^2$ |
|---------|----------------------------------------------------------------------|----------------|--------|-------|--------|-------|
| SFW     | Shoot fresh weight (g)                                               | 1.28-14.24     | 6.71   | 2.12  | 31.68  | 0.92  |
| TWU     | Total water uptake (g)                                               | 704.26-1382.86 | 999.1  | 101.6 | 10.17  | 0.88  |
| TE      | Transpiration efficiency<br>(g SFW g <sup>-1</sup> TWU)              | 1.82-11.35     | 6.60   | 1.58  | 23.89  | 0.91  |
| TEr     | Residuals of transpiration<br>efficiency                             | -5.24-3.34     | 0.0009 | 1.09  | 126167 | 0.73  |
| TR      | Transpiration rate<br>(ml water sec <sup>-1</sup> cm <sup>-2</sup> ) | 0.01-0.05      | 0.03   | 0.006 | 18.71  | 0.16  |
| SlopeTR | Transpiration response to<br>increasing evaporative demand           | 0.2-3.26       | 0.69   | 0.24  | 34.71  | 0.42  |

872

873 **Table 2: List of candidate genes identified in genetic regions associated with shoot fresh**  
 874 **weight (SWF), total water uptake (TWU), transpiration efficiency (TE), residuals of**  
 875 **transpiration efficiency (TEr), and transpiration response to evaporative demand (SlopeTR).**  
 876

| Trait        | Chr_position  | Locus (MSU)                                        | Annotation                              | Hypothetical function                                           | Reference                                                  |
|--------------|---------------|----------------------------------------------------|-----------------------------------------|-----------------------------------------------------------------|------------------------------------------------------------|
| SWF, TE      | Chr5_26971730 | LOC_Os05g46560                                     | RAN GTPase-activating protein 1         | Auxin-mediated root development                                 | Kim <i>et al.</i> , 2001<br>Wang <i>et al.</i> , 2006      |
|              |               | LOC_Os05g46580                                     | Polyprenyl synthetase                   | Photosynthesis through Plastoquinone biosynthesis               | Liu <i>et al.</i> , 2019<br>Havaux, 2020                   |
| TWU          | Chr1_21989359 | LOC_Os01g39110                                     | ZOS1-10 C2H2 zinc finger family protein | Development, drought response                                   | Agarwal <i>et al.</i> , 2007<br>Huang <i>et al.</i> , 2009 |
| TE           | Chr7_15311728 | LOC_Os07g26630<br>LOC_Os07g26660<br>LOC_Os07g26690 | Plasma membrane aquaporins              | Water transport and use, response to abiotic stresses           | Sakurai <i>et al.</i> , 2005<br>Guo <i>et al.</i> , 2006   |
|              |               | LOC_Os07g26720                                     | OsRR7, type-A response regulator        | Abiotic responses through abscisic acid and cytokinin signaling | Huang <i>et al.</i> , 2018<br>Zeng <i>et al.</i> , 2021    |
| TEr, SlopeTR | Chr1_9237408  | LOC_Os01g16220                                     | Sad1 - UNC-like C-terminal domain       | Plant development                                               | Li <i>et al.</i> , 2015                                    |
|              |               | LOC_Os01g15979                                     | G $\beta$ protein                       | Cell expansion and lipid metabolism                             | Choudhury <i>et al.</i> , 2019                             |
| TEr          | Chr4_6544212  | LOC_Os04g11830                                     | TCP family transcription factor         | Leaf development                                                | Koyama <i>et al.</i> , 2010<br>Li <i>et al.</i> , 2020     |
|              |               | LOC_Os04g12010                                     | Glycosyltransferase                     | Cell wall formation                                             | Anders <i>et al.</i> , 2012<br>Lin <i>et al.</i> , 2016    |
| SlopeTR      | Chr2_23902475 | LOC_Os02g39590                                     | GDSL-like lipase/acylhydrolase          | Growth and development, stress responses                        | Zhang <i>et al.</i> , 2017                                 |

877



878 **Figure legends**

879 **Fig. 1: Variation in shoot fresh weight, water uptake and transpiration efficiency (TE) in *O.***  
880 ***glaberrima*.** A-B: Variation in shoot fresh weight (A) and water uptake (B) from 17 to 29 days  
881 after sowing (DAS) during the large-scale experiment. C: Variation in TE measured as the ratio  
882 between shoot fresh weight and total water uptake at 29 DAS in the large-scale experiment.  
883 D: Covariation between TE measured in the large-scale experiment (PhenoArch) and in a  
884 subset of genotypes in the small-scale experiment. R: Pearson's correlation coefficient;  $p$ :  $p$ -  
885 value of the Pearson's correlation test. Genotypes from the subset are highlighted in A, B and  
886 C following the same color legend as in D.

887

888 **Fig. 2: Correlation between water use-related traits in *O. glaberrima*.** A: Pearson's  
889 correlation coefficient (R) between averaged values shoot fresh weight (SFW), total water  
890 uptake (TWU), transpiration efficiency (TE), residuals of transpiration efficiency (TEr) at 29  
891 days after sowing and transpiration response to evaporative demand (SlopeTR) measured in  
892 the large-scale experiment. B: Covariation between TE and SlopeTR. Dots represent the  
893 averaged TE plotted against the average SlopeTR for individual genotypes. Genotypes  
894 highlighted in color are from the subset used in the small-scale experiment, following the  
895 same color legend as in Fig. 1.

896

897 **Fig. 3: Relation between water use-related traits and plant morphology in a subset of *O.***  
898 ***glaberrima* genotypes.** A: Evolution of transpiration rate (TR; colored lines) upon increasing  
899 vapor pressure deficit (VPD; black dots) measured in the small-scale experiment at 35 days  
900 after sowing. B: Relationship between tiller number (Tiller), transpiration efficiency (TE),  
901 residuals of transpiration efficiency (TEr), shoot fresh weight (SFW), shoot dry weight (SDW),  
902 leaf area (LA), total water uptake (TWU), root dry weight (RDW), root to shoot ratio  
903 (RootShoot) transpiration response to increasing evaporative demand (SlopeTR), TR and TR  
904 inflexion in response to increasing evaporative demand (InflexionTR) measured at 35 days  
905 after sowing in the small-scale experiment, and analyzed using principal component (PC)  
906 analysis. C-D: Covariation between TE and SlopeTR (C) and between root to shoot ratio and  
907 SlopeTR (D). Dots represent the averaged TE or root to shoot ratio plotted against the average  
908 SlopeTR for individual genotypes. R: Pearson's correlation coefficient;  $p$ :  $p$ -value of the  
909 Pearson's correlation test. Color legend is the same as in A.

910 **Fig. 4: Genome wide association studies for shoot fresh weight, total water uptake,**  
911 **transpiration efficiency (TE), and residuals of transpiration efficiency (TEr) in *O. glaberrima*.**  
912 Manhattan plots (A-D) and QQ-plots (E-H) obtained with the latent factor mixed model  
913 (LFMM) are shown. Manhattan plots show the  $\log_{10}$   $p$ -value (y axis) at each SNP position on  
914 the different chromosomes (x axis). The red lines in A-D delimit the threshold for highly  
915 significant SNPs ( $p$ -value  $< 10^{-5}$ ).

916

917 **Fig. 5: Genome wide association studies for transpiration response to increasing evaporative**  
918 **demand in *O. glaberrima*.** Manhattan plots (A) and QQ-plots (B) obtained with the latent  
919 factor mixed model (LFMM) are shown. Manhattan plots show the  $\log_{10}$   $p$ -value (y axis) at  
920 each SNP position on the different chromosomes (x axis). The red line in A delimits the  
921 threshold for highly significant SNPs ( $p$ -value  $< 10^{-5}$ ).

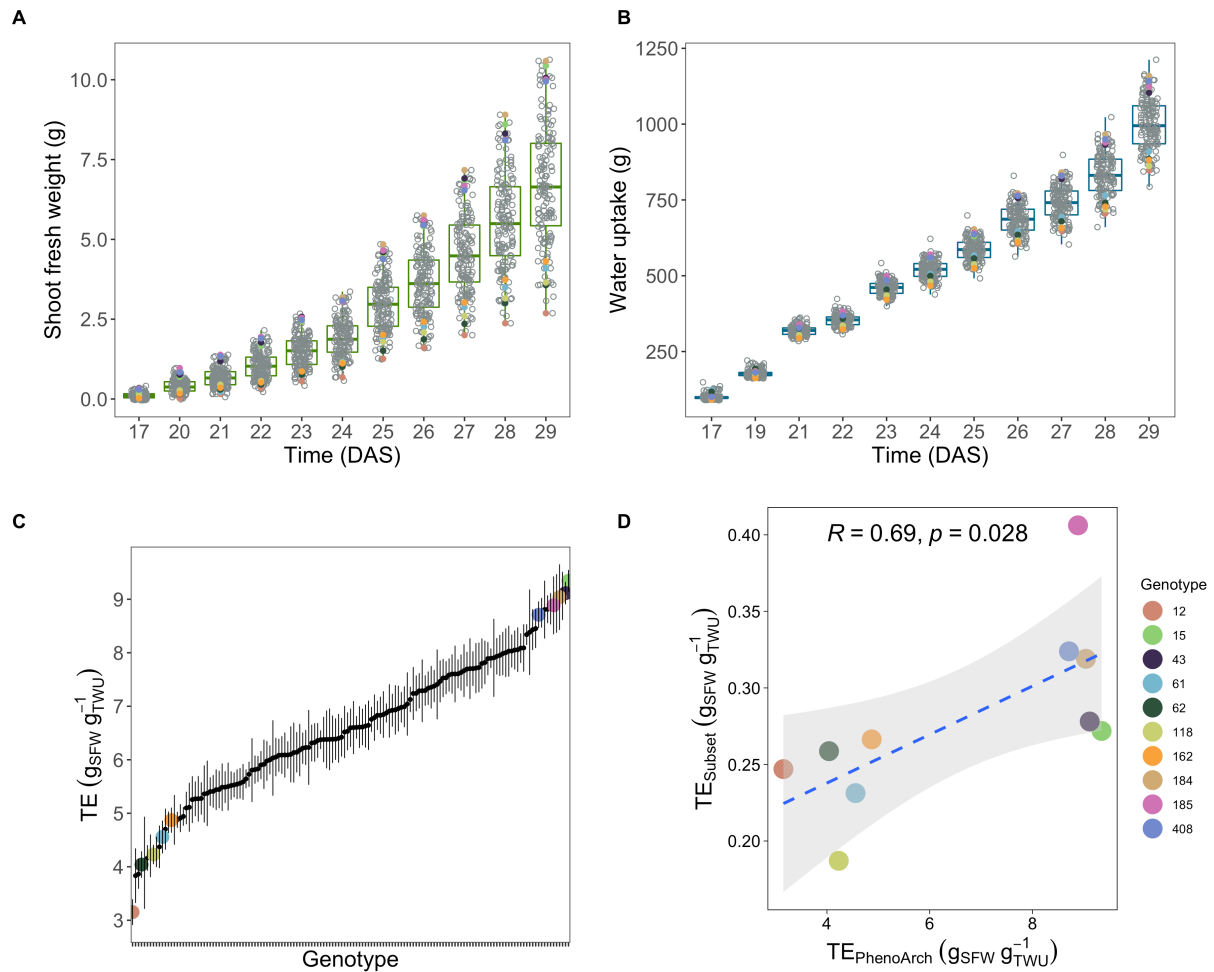

922

923 **Fig. 1: Variation in shoot fresh weight, water uptake and transpiration efficiency (TE) in *O.***

924 ***glaberrima*.** A-B: Variation in shoot fresh weight (A) and water uptake (B) from 17 to 29 days

925 after sowing (DAS) during the large-scale experiment. C: Variation in TE measured as the ratio

926 between shoot fresh weight and total water uptake at 29 DAS in the large-scale experiment.

927 D: Covariation between TE measured in the large-scale experiment (PhenoArch) and in a

928 subset of genotypes in the small-scale experiment. R: Pearson's correlation coefficient;  $p$ :  $p$ -

929 value of the Pearson's correlation test; SFW: shoot fresh weight; TWU: total water uptake.

930 Genotypes from the subset are highlighted in A, B and C following the same color legend as in

931 D.

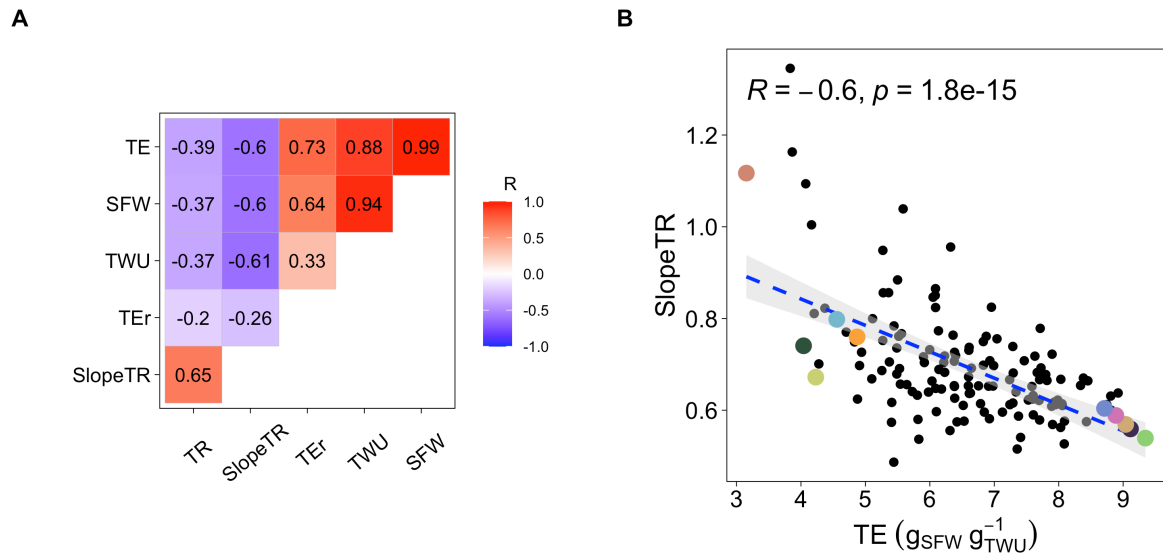

932

933 **Fig. 2: Correlation between water use-related traits in *O. glaberrima*.** A: Pearson's  
934 correlation coefficient (R) between averaged values shoot fresh weight (SFW), total water  
935 uptake (TWU), transpiration efficiency (TE), residuals of transpiration efficiency (TEr) at 29  
936 days after sowing and transpiration response to evaporative demand (SlopeTR) measured in  
937 the large-scale experiment. B: Covariation between TE and SlopeTR. Dots represent the  
938 averaged TE plotted against the average SlopeTR for individual genotypes. Genotypes  
939 highlighted in color are from the subset used in the small-scale experiment, following the  
940 same color legend as in Fig. 1.

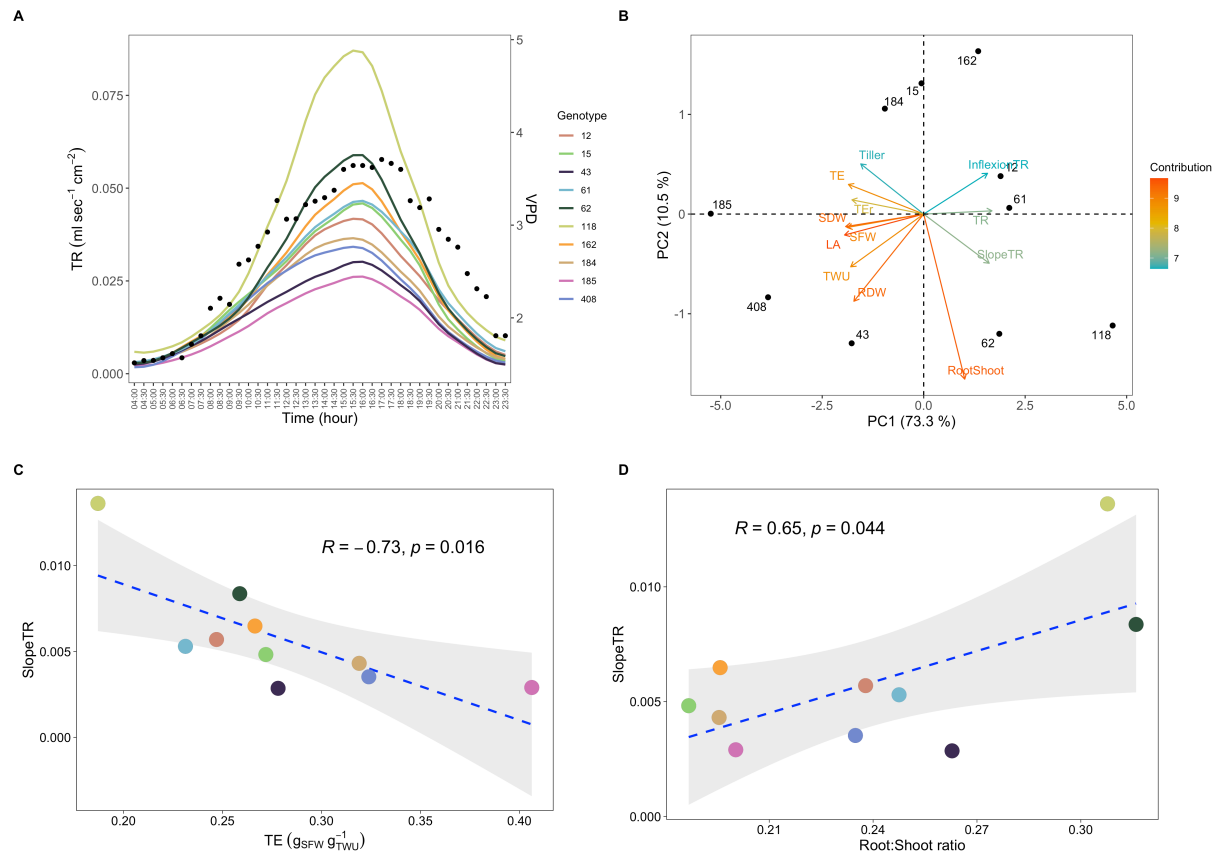

941

942 **Fig. 3: Relation between water use-related traits and plant morphology in a subset of *O.***

943 ***glaberrima* genotypes.** A: Evolution of transpiration rate (TR; colored lines) upon increasing

944 vapor pressure deficit (VPD; black dots) measured in the small-scale experiment at 35 days

945 after sowing. B: Relationship between tiller number (Tiller), transpiration efficiency (TE),

946 residuals of transpiration efficiency (TEr), shoot fresh weight (SFW), shoot dry weight (SDW),

947 leaf area (LA), total water uptake (TWU), root dry weight (RDW), root to shoot ratio

948 (RootShoot) transpiration response to increasing evaporative demand (SlopeTR), TR and TR

949 inflexion in response to increasing evaporative demand (InflexionTR) measured at 35 days

950 after sowing in the small-scale experiment, and analyzed using principal component (PC)

951 analysis. C-D: Covariation between TE and SlopeTR (C) and between root to shoot ratio and

952 SlopeTR (D). Dots represent the averaged TE or root to shoot ratio plotted against the average

953 SlopeTR for individual genotypes. R: Pearson's correlation coefficient; *p*: *p*-value of the

954 Pearson's correlation test. Color legend is the same as in A.

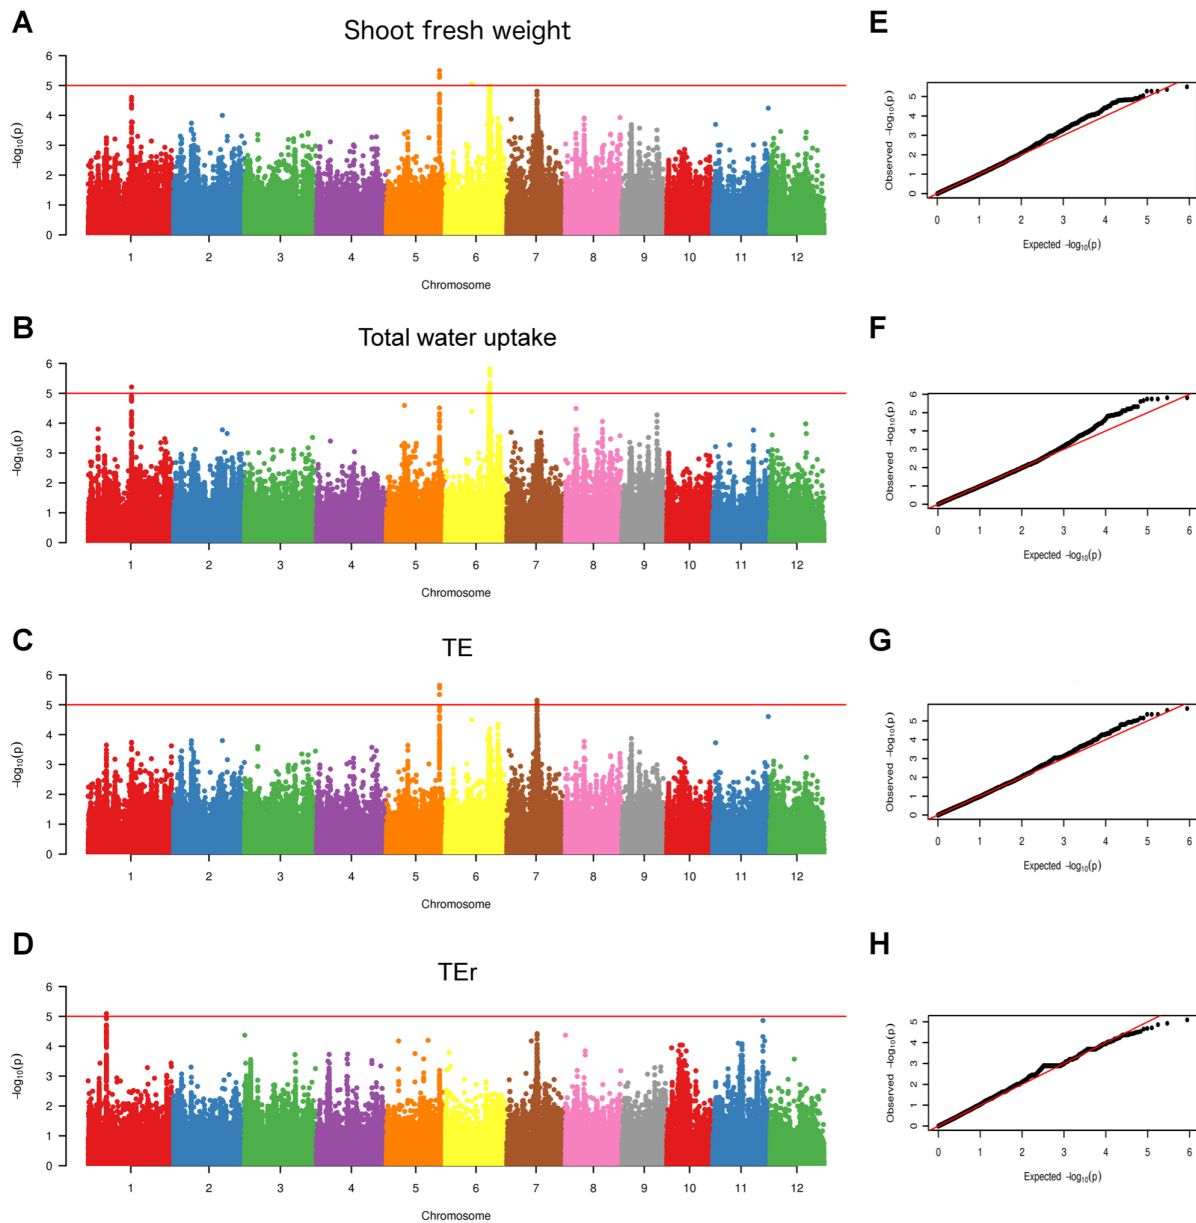

955

956 **Fig. 4: Genome wide association studies for shoot fresh weight, total water uptake,**  
957 **transpiration efficiency (TE), and residuals of transpiration efficiency (TEr) in *O. glaberrima*.**

958 Manhattan plots (A-D) and QQ-plots (E-H) obtained with the latent factor mixed model  
959 (LFMM) are shown. Manhattan plots show the  $\log_{10} p$ -value (y axis) at each SNP position on  
960 the different chromosomes (x axis). The red lines in A-D delimit the threshold for highly  
961 significant SNPs ( $p$ -value  $< 10^{-5}$ ).

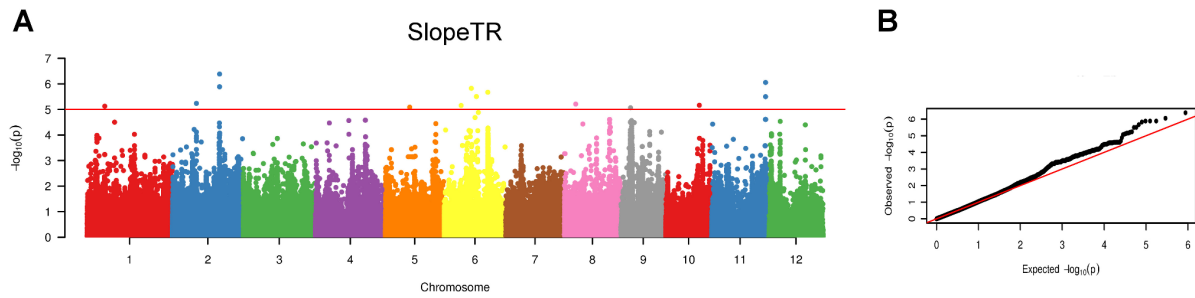

962

963 **Fig. 5: Genome wide association studies for transpiration response (SlopeTR) to increasing**

964 **evaporative demand in *O. glaberrima*.** Manhattan plots (A) and QQ-plots (B) obtained with

965 the latent factor mixed model (LFMM) are shown. Manhattan plots show the log<sub>10</sub> *p*-value (y

966 axis) at each SNP position on the different chromosomes (x axis). The red line in A delimits the

967 threshold for highly significant SNPs (*p*-value < 10<sup>-5</sup>).
